# Supplementary material for: Direct ETTIN-auxin interaction controls chromatin states in gynoecium development
Source: eLife. 2020 Apr 8;9:e51787. doi: 10.7554/eLife.51787 (PMC7164952; doi:10.7554/eLife.51787)
Supplement: Figure 1—source data 1. [file elife-51787-fig1-data1.xlsx]

## Sheet: Sheet1
Figure 1-source data 1. Parameters for NMR experiments.
Experiment	Recycling Delays (S)	Scans	Nuclei		Spectral width (Hz)		Number of complex points
			t1	t2	t1	t2	t1	t2
HSQC	1	56	15N	1H	2888.6	15243.9	256	2048
