# Supplementary material for: Direct ETTIN-auxin interaction controls chromatin states in gynoecium development
Source: eLife. 2020 Apr 8;9:e51787. doi: 10.7554/eLife.51787 (PMC7164952; doi:10.7554/eLife.51787)
Supplement: Figure 2—source data 1. [file elife-51787-fig2-data1.xlsx]

## Sheet: Sheet1
Figure 2-source data 1. Oligonucleotides used in this study
Primer ID	Orientation	Amplicon	Sequence	Purpose
AK348	FW	HEC1 0	TGCATCAGATGGAGAAGCTTC	ChIP
AK349	Rev	HEC1 0	ACCTGGTTCGTTGGTCATTG	ChIP
AK358	FW	HEC1 -1500	TATCGGGTTGTCAGATGCAG	ChIP
AK359	Rev	HEC1 -1500	ACTGACTTTCCTTCTGGCGA	ChIP
AK346	FW	HEC1 -200	GCTTGAGTTCTGATTGGGCA	ChIP
AK347	Rev	HEC1 -200	TGGGTATGGAGAGAAACTGGT	ChIP
AK356	FW	HEC1 -2000	ACAGTGAGAGCTTGTGGTGT	ChIP
AK357	Rev	HEC1 -2000	ACCGTAAACAAGAAGCAGCA	ChIP
AK352	FW	HEC1 300	ATGATCTTCCGTATCGCCGT	ChIP
AK353	Rev	HEC1 300	ATCCATCTTCGTCCCACCAG	ChIP
AK354	FW	HEC1 700	ACTCATCAGATGGTGGGCAA	ChIP
AK355	Rev	HEC1 700	CTTGGCTTCCCTCTCCAGAA	ChIP
AK360	FW	HEC1 -800	TGTTGTGCTTGTGAGACGAC	ChIP
AK361	Rev	HEC1 -800	CGCATTTATCGACCGTCCAG	ChIP
AK102	FW	PID 0	TGAGGCGAAAATCTCGGAAG	ChIP
AK103	Rev	PID 0	TCAGCCGGTTATCATTCGAC	ChIP
AK104	FW	PID -1000	CTAGAGAACTCATGGTCACGG	ChIP
AK105	Rev	PID -1000	ATATAGGTTGGGTCCCTTCCAG	ChIP
AK098	FW	PID 1100	TGGTTCTAAAGTCTGAACCT	ChIP
AK099	Rev	PID 1100	CTCTCTCTATGCTCCGACTC	ChIP
AK096	FW	PID 1400	ACTAAACGTCGCCGATTTCA	ChIP
AK097	Rev	PID 1400	ACTAAAAGACTTGGGTCACG	ChIP
AK213	FW	PID 300	CTCAGCGTAAAGAGTCGGC	ChIP
AK214	Rev	PID 300	GGAGACGAAGAAGAGAGCCG	ChIP
AK377	FW	PID -400	GAATCACTAGTCCAATATTTCTCC	ChIP
AK378	Rev	PID -400	CAGTAAAAAGACGTTACAGAGACC	ChIP
AK211	FW	PID 700	ACTAGAACTTCGGCGGCATA	ChIP
AK212	Rev	PID 700	TCATGTCGGTCTTTTCCAGTTC	ChIP
AK375	FW	WUS (WUSp4)	ATCCAGACCATACTATATACAGGGG	ChIP
AK376	Rev	WUS (WUSp4)	GTGTAATGGAAACTAGACTCACGTGC	ChIP
AK420	Fw	ETT	GGGGACAAGTTTGTACAAAAAAGCAGGCTTTATGGGTGGTTTAATCGATCTGAACG	Gateway Cloning
AK340	Rev	ETT	GGGGACCACTTTGTACAAGAAAGCTGGGTACTAGAGAGCAATGTCTAGCAACATG	Gateway Cloning
AK330	FW	ETT L552S;F553S	ATGCAGGTCTTCTGGTTTCC	Gateway Cloning
AK331	Rev	ETT L552S;F553S	GGAAACCAGAAGACCTGCAT	Gateway Cloning
AK383	Fw	CRISPR TPR2 Guide 1	agGGAAAATGAGCAACTGTCG	Genotyping
AK384	FW	CRISPR TPR2 Guide 2	TCTTGCTCACCATCAAACGG	Genotyping
AK385	Rev	CRISPR TPR2 Guide 3	TTGGATGTTTGTGCAGACCG	Genotyping
AK386	Rev	CRISPR TPR2 Guide 4	TCGAGGTGTTGACGTAGGTC	Genotyping
AK255	FW	SALK_034518C	GCTATGCTGTTTATTGCAGGC	Genotyping
AK256	Rev	SALK_034518C	GTTCTGAATTGCAGGAGTTGC	Genotyping
AK325	Fw	SALK_139443	ACTCTCTTCCTTGTCTGCGTG	Genotyping
AK326	Rev	SALK_139443	ACCAGACAATGAATCAGCACC	Genotyping
AK364	FW	CRISPR TPR2 Guide 1	TGTGGTCTCAATTGGCTAGCTTCTCTCGAAACAGGTTTAAGAGCTATGCTGGAA	GoldenGate
AK365	FW	CRISPR TPR2 Guide 2	TGTGGTCTCAATTGGACTCCACCATGCACTCCAAGGTTTAAGAGCTATGCTGGAA	GoldenGate
AK366	FW	CRISPR TPR2 Guide 3	TGTGGTCTCAATTGGAGAGAGTTAGACGGTGCCCGGTTTAAGAGCTATGCTGGAA	GoldenGate
AK367	FW	CRISPR TPR2 Guide 4	TGTGGTCTCAATTGGCTCCATGCTACACGAGTGAGTTTAAGAGCTATGCTGGAA	GoldenGate
AK299	FW	pTPL	CCTCTAGAGTCGACCTGCAGAAATGGTTTGAACGCTTCGT	infusion cloning
AK300	Rev	pTPL	CTCAGATCTACCATGGGTTTTCTCTCACTTCCTTAAAAGAC	infusion cloning
AK301	FW	pTPR2	CCTCTAGAGTCGACCTGCAGCGGTGGTATGCAACAGAAAA	infusion cloning
AK302	Rev	pTPR2	CTCAGATCTACCATGGTTTTTCCTAAAACTCTCAGAAGAAG	infusion cloning
AK303	FW	pTPR4	CCTCTAGAGTCGACCTGCAGACGCTTTGTCTGGAGAAGGT	infusion cloning
AK304	Rev	pTPR4	CTCAGATCTACCATGGATCCTCTTCTTATTGCTCGCTC	infusion cloning
AK399	FW	HDA19	CGCTCACTACGGTCTCCTTC	qPCR
AK400	Rev	HDA19	GGTAATGCTGCGGAGAAAAG	qPCR
AK397	FW	HDA6	ATTCGCCGGAGTATGTTGAC	qPCR
AK398	Rev	HDA6	AAGGATCGCCCATAGATTCC	qPCR
AK348	FW	HEC1	TGCATCAGATGGAGAAGCTTC	qPCR
AK349	Rev	HEC1	ACCTGGTTCGTTGGTCATTG	qPCR
AK295	FW	IAA19	GAGCATGGATGGTGTGCCTTAT	qPCR
AK296	Rev	IAA19	TTCGCAGTTGTCACCATCTTTC	qPCR
AK205	FW	PID	ATTTACACTCTCTCCGTCATAGACAAC	qPCR
AK206	Rev	PID	ACATGTGTAGATATTCTAACGCCACTA	qPCR
AK387	FW	TPL	CTCGAGGCTTTGGATAAGCATG	qPCR
AK388	Rev	TPL	ACACTTTCAAATCCTTCACTAGTATATCCAC	qPCR
AK389	FW	TPR1	ATTGGCATCAAATGCTATTCATCTG	qPCR
AK390	Rev	TPR1	AGTTGCATTACGGTCATTTCGC	qPCR
AK391	FW	TPR2	CAGCTGCTTACTCTGGAGAATTTTAGG	qPCR
AK392	Rev	TPR2	AGATTTAGTATCACCATATTTCGACAGTTG	qPCR
AK393	FW	TPR3	ACTCTATTCACAGACCACACTTGCAC	qPCR
AK394	Rev	TPR3	AACAGGCTGATTGACTGCTGAAG	qPCR
AK395	FW	TPR4	TGATACACGTGAGGGAAACAAAGAG	qPCR
AK396	Rev	TPR4	TGACATAAGAATCATTTTTTGAGAGTGC	qPCR
AK203	FW	UBQ10	AGAACTCTTGCTGACTACAATATCCAG	qPCR
AK204	Rev	UBQ10	ATAGTTTTCCCAGTCAACGTCTTAAC	qPCR
