# Supplementary material for: Direct ETTIN-auxin interaction controls chromatin states in gynoecium development
Source: eLife. 2020 Apr 8;9:e51787. doi: 10.7554/eLife.51787 (PMC7164952; doi:10.7554/eLife.51787)
Supplement: Figure 2—source data 2. [file elife-51787-fig2-data2.xlsx]

## Sheet: Sheet1
Figure 2-source data 2. Output of statistical tests
Table Analyzed	Figure 1 c
Two-way RM ANOVA	Matching by rows
Source of Variation	% of total variation	P value
Interaction	32.64	< 0.0001
Row Factor	9.51	< 0.0001
Time	52.02	< 0.0001
Subjects (matching)	0.7773	0.7068
Source of Variation	P value summary	Significant?
Interaction	****	Yes
Row Factor	****	Yes
Time	****	Yes
Subjects (matching)	ns	No
Source of Variation	Df	Sum-of-squares	Mean square	F
Interaction	10	33.99	3.399	48.43
Row Factor	2	9.906	4.953	91.77
Time	5	54.17	10.83	154.4
Subjects (matching)	15	0.8095	0.05397	0.7689
Residual	75	5.264	0.07019
Number of missing values	0
Bonferroni multiple comparisons	Number of comparisons: 45
Col-0 vs Col-0 +IAA
Row Factor	Col-0	Col-0 +IAA	Difference	95% CI of diff.
IAA19	1	3.794	2.794	2.275 to 3.313
HEC1	1	2.932	1.932	1.413 to 2.451
PID	1	1.841	0.8412	0.3223 to 1.360
Row Factor	Difference	t	P value	Summary
IAA19	2.794	18.27	P < 0.0001	****
HEC1	1.932	12.63	P < 0.0001	****
PID	0.8412	5.499	P < 0.0001	****
Col-0 vs tir1afb2
Row Factor	Col-0	tir1afb2	Difference	95% CI of diff.
IAA19	1	1	2.384e-07	-0.5188 to 0.5188
HEC1	1	1	-5.96e-08	-0.5188 to 0.5188
PID	1	1	2.98e-07	-0.5188 to 0.5188
Row Factor	Difference	t	P value	Summary
IAA19	2.384e-07	1.559e-06	P > 0.05	ns
HEC1	-5.96e-08	3.897e-07	P > 0.05	ns
PID	2.98e-07	1.948e-06	P > 0.05	ns
Col-0 vs tir1afb2 +IAA
Row Factor	Col-0	tir1afb2 +IAA	Difference	95% CI of diff.
IAA19	1	1.044	0.04416	-0.4747 to 0.5630
HEC1	1	3.068	2.068	1.549 to 2.587
PID	1	1.995	0.9946	0.4758 to 1.513
Row Factor	Difference	t	P value	Summary
IAA19	0.04416	0.2887	P > 0.05	ns
HEC1	2.068	13.52	P < 0.0001	****
PID	0.9946	6.502	P < 0.0001	****
Col-0 vs tir1afb2afb3
Row Factor	Col-0	tir1afb2afb3	Difference	95% CI of diff.
IAA19	1	1	3.576e-07	-0.5188 to 0.5188
HEC1	1	1	-5.96e-08	-0.5188 to 0.5188
PID	1	1	2.98e-07	-0.5188 to 0.5188
Row Factor	Difference	t	P value	Summary
IAA19	3.576e-07	2.338e-06	P > 0.05	ns
HEC1	-5.96e-08	3.897e-07	P > 0.05	ns
PID	2.98e-07	1.948e-06	P > 0.05	ns
Col-0 vs tir1afb2afb3 +IAA
Row Factor	Col-0	tir1afb2afb3 +IAA	Difference	95% CI of diff.
IAA19	1	0.9895	-0.01053	-0.5293 to 0.5083
HEC1	1	3.475	2.475	1.956 to 2.994
PID	1	1.606	0.606	0.08721 to 1.125
Row Factor	Difference	t	P value	Summary
IAA19	-0.01053	0.06887	P > 0.05	ns
HEC1	2.475	16.18	P < 0.0001	****
PID	0.606	3.962	P < 0.01	**
Table Analyzed	Figure 1d
Two-way RM ANOVA	Matching by rows
Source of Variation	% of total variation	P value
Interaction	26.69	< 0.0001
Genes	2.5	0.1341
Genotpye and treatment	62.23	< 0.0001
Subjects (matching)	2.6234	0.0702
Source of Variation	P value summary	Significant?
Interaction	****	Yes
Genes	ns	No
Genotpye and treatment	****	Yes
Subjects (matching)	ns	No
Source of Variation	Df	Sum-of-squares	Mean square	F
Interaction	10	19.35	1.935	13.46
Genes	2	1.814	0.9071	2.861
Genotpye and treatment	5	45.13	9.025	62.76
Subjects (matching)	6	1.902	0.317	2.205
Residual	30	4.314	0.1438
Number of missing values	0
Bonferroni multiple comparisons	Number of comparisons: 45
Col-0 vs Col-0 +cvxIAA
Genes	Col-0	Col-0 +cvxIAA	Difference	95% CI of diff.
IAA19	1	0.9416	-0.05841	-1.175 to 1.058
HEC1	1	0.9516	-0.04843	-1.165 to 1.068
PID	1	0.8041	-0.1959	-1.313 to 0.9208
Genes	Difference	t	P value	Summary
IAA19	-0.05841	0.1887	P > 0.05	ns
HEC1	-0.04843	0.1564	P > 0.05	ns
PID	-0.1959	0.6327	P > 0.05	ns
Col-0 vs Col-0 +IAA
Genes	Col-0	Col-0 +IAA	Difference	95% CI of diff.
IAA19	1	3.477	2.477	1.360 to 3.593
HEC1	1	4.055	3.055	1.938 to 4.171
PID	1	2.299	1.299	0.1826 to 2.416
Genes	Difference	t	P value	Summary
IAA19	2.477	7.998	P < 0.0001	****
HEC1	3.055	9.866	P < 0.0001	****
PID	1.299	4.196	P < 0.01	**
Col-0 vs ccvTIR1
Genes	Col-0	ccvTIR1	Difference	95% CI of diff.
IAA19	1	1.14	0.1397	-0.9770 to 1.256
HEC1	1	0.8307	-0.1693	-1.286 to 0.9474
PID	1	0.8425	-0.1575	-1.274 to 0.9592
Genes	Difference	t	P value	Summary
IAA19	0.1397	0.4512	P > 0.05	ns
HEC1	-0.1693	0.5469	P > 0.05	ns
PID	-0.1575	0.5087	P > 0.05	ns
Col-0 vs ccvTIR1 +cvxIAA
Genes	Col-0	ccvTIR1 +cvxIAA	Difference	95% CI of diff.
IAA19	1	3.738	2.738	1.621 to 3.854
HEC1	1	1.528	0.528	-0.5887 to 1.645
PID	1	1.451	0.4505	-0.6662 to 1.567
Genes	Difference	t	P value	Summary
IAA19	2.738	8.842	P < 0.0001	****
HEC1	0.528	1.705	P > 0.05	ns
PID	0.4505	1.455	P > 0.05	ns
Col-0 vs ccvTIR1 +IAA
Genes	Col-0	ccvTIR1 +IAA	Difference	95% CI of diff.
IAA19	1	1.327	0.327	-0.7897 to 1.444
HEC1	1	3.207	2.207	1.090 to 3.323
PID	1	2.868	1.868	0.7514 to 2.985
Genes	Difference	t	P value	Summary
IAA19	0.327	1.056	P > 0.05	ns
HEC1	2.207	7.127	P < 0.0001	****
PID	1.868	6.034	P < 0.0001	****
Table Analyzed	Figure 2-figure supplement 1 (HEC1)
One-way analysis of variance
P value	< 0.0001
P value summary	****
Are means signif. different? (P < 0.05)	Yes
Number of groups	4
F	55.89
R square	0.8934
Bartlett's test for equal variances
Bartlett's statistic (corrected)	3.83
P value	0.2804
P value summary	ns
Do the variances differ signif. (P < 0.05)	No
ANOVA Table	SS	df	MS
Treatment (between columns)	38.68	3	12.89
Residual (within columns)	4.614	20	0.2307
Total	43.3	23
Tukey's Multiple Comparison Test	Mean Diff.	q	Significant? P < 0.05?	Summary	95% CI of diff
Col-0 vs Col-0+IAA	-1.922	9.801	Yes	***	-2.698 to -1.146
Col-0 vs ett-3	-2.906	14.82	Yes	***	-3.682 to -2.130
Col-0 vs ett-3 +IAA	-3.274	16.7	Yes	***	-4.050 to -2.498
Col-0+IAA vs ett-3	-0.9844	5.02	Yes	**	-1.760 to -0.2083
Col-0+IAA vs ett-3 +IAA	-1.352	6.895	Yes	***	-2.128 to -0.5760
ett-3 vs ett-3 +IAA	-0.3677	1.875	No	ns	-1.144 to 0.4084
Table Analyzed	Figure 2-figure supplement 1 (PID)
One-way analysis of variance
P value	< 0.0001
P value summary	****
Are means signif. different? (P < 0.05)	Yes
Number of groups	4
F	14.47
R square	0.6846
Bartlett's test for equal variances
Bartlett's statistic (corrected)	1.046
P value	0.7901
P value summary	ns
Do the variances differ signif. (P < 0.05)	No
ANOVA Table	SS	df	MS
Treatment (between columns)	3.103	3	1.034
Residual (within columns)	1.43	20	0.0715
Total	4.533	23
Tukey's Multiple Comparison Test	Mean Diff.	q	Significant? P < 0.05?	Summary	95% CI of diff
Col-0 vs Col-0+IAA	-0.8574	7.855	Yes	***	-1.289 to -0.4254
Col-0 vs ett-3	-0.7946	7.279	Yes	***	-1.227 to -0.3626
Col-0 vs ett-3 +IAA	-0.8344	7.644	Yes	***	-1.266 to -0.4023
Col-0+IAA vs ett-3	0.06279	0.5752	No	ns	-0.3693 to 0.4948
Col-0+IAA vs ett-3 +IAA	0.02302	0.2108	No	ns	-0.4090 to 0.4551
ett-3 vs ett-3 +IAA	-0.03978	0.3644	No	ns	-0.4718 to 0.3923
