# Supplementary material for: Direct ETTIN-auxin interaction controls chromatin states in gynoecium development
Source: eLife. 2020 Apr 8;9:e51787. doi: 10.7554/eLife.51787 (PMC7164952; doi:10.7554/eLife.51787)
Supplement: Figure 3—source data 1. [file elife-51787-fig3-data1.xlsx]

## Sheet: Sheet1
Figure 3-source data 1. Output of statistical tests
Table Analyzed	ONPG +NAA
One-way analysis of variance
P value	< 0.0001
P value summary	****
Are means signif. different? (P < 0.05)	Yes
Number of groups	14
F	124.6
R square	0.983
ANOVA Table	SS	df	MS
Treatment (between columns)	4568	13	351.4
Residual (within columns)	78.95	28	2.82
Total	4647	41
Tukey's Multiple Comparison Test	Mean Diff.	q	Significant? P < 0.05?	Summary	95% CI of diff
ETT-EV vs ETT-EV +NAA	0.05782	0.05964	No	ns	-4.966 to 5.081
ETT-EV vs EV-TPL	0.4918	0.5073	No	ns	-4.532 to 5.515
ETT-EV vs EV-TPL +NAA	0.1964	0.2026	No	ns	-4.827 to 5.220
ETT-EV vs EV-TPR2	-0.6858	0.7074	No	ns	-5.709 to 4.338
ETT-EV vs EV-TPR2 +NAA	-0.3963	0.4088	No	ns	-5.420 to 4.627
ETT-EV vs EV-TPR4	-0.32	0.3301	No	ns	-5.343 to 4.703
ETT-EV vs EV-TPR4 +NAA	-0.5429	0.56	No	ns	-5.566 to 4.481
ETT-EV vs ETT-TPL	-20.75	21.41	Yes	***	-25.78 to -15.73
ETT-EV vs ETT-TPL +NAA	-20.61	21.26	Yes	***	-25.63 to -15.59
ETT-EV vs ETT-TPR2	-25.44	26.25	Yes	***	-30.47 to -20.42
ETT-EV vs ETT-TPR2 +NAA	-22.55	23.26	Yes	***	-27.57 to -17.52
ETT-EV vs ETT-TPR4	-17.72	18.28	Yes	***	-22.74 to -12.70
ETT-EV vs ETT-TPR4 +NAA	-18.6	19.19	Yes	***	-23.62 to -13.58
ETT-EV +NAA vs EV-TPL	0.434	0.4476	No	ns	-4.589 to 5.457
ETT-EV +NAA vs EV-TPL +NAA	0.1386	0.143	No	ns	-4.885 to 5.162
ETT-EV +NAA vs EV-TPR2	-0.7436	0.767	No	ns	-5.767 to 4.280
ETT-EV +NAA vs EV-TPR2 +NAA	-0.4541	0.4684	No	ns	-5.478 to 4.569
ETT-EV +NAA vs EV-TPR4	-0.3778	0.3897	No	ns	-5.401 to 4.646
ETT-EV +NAA vs EV-TPR4 +NAA	-0.6007	0.6196	No	ns	-5.624 to 4.423
ETT-EV +NAA vs ETT-TPL	-20.81	21.47	Yes	***	-25.83 to -15.79
ETT-EV +NAA vs ETT-TPL +NAA	-20.67	21.32	Yes	***	-25.69 to -15.64
ETT-EV +NAA vs ETT-TPR2	-25.5	26.3	Yes	***	-30.52 to -20.48
ETT-EV +NAA vs ETT-TPR2 +NAA	-22.6	23.32	Yes	***	-27.63 to -17.58
ETT-EV +NAA vs ETT-TPR4	-17.78	18.34	Yes	***	-22.80 to -12.75
ETT-EV +NAA vs ETT-TPR4 +NAA	-18.66	19.25	Yes	***	-23.68 to -13.63
EV-TPL vs EV-TPL +NAA	-0.2953	0.3046	No	ns	-5.319 to 4.728
EV-TPL vs EV-TPR2	-1.178	1.215	No	ns	-6.201 to 3.846
EV-TPL vs EV-TPR2 +NAA	-0.8881	0.9161	No	ns	-5.912 to 4.135
EV-TPL vs EV-TPR4	-0.8118	0.8374	No	ns	-5.835 to 4.212
EV-TPL vs EV-TPR4 +NAA	-1.035	1.067	No	ns	-6.058 to 3.989
EV-TPL vs ETT-TPL	-21.24	21.91	Yes	***	-26.27 to -16.22
EV-TPL vs ETT-TPL +NAA	-21.1	21.77	Yes	***	-26.12 to -16.08
EV-TPL vs ETT-TPR2	-25.94	26.75	Yes	***	-30.96 to -20.91
EV-TPL vs ETT-TPR2 +NAA	-23.04	23.76	Yes	***	-28.06 to -18.01
EV-TPL vs ETT-TPR4	-18.21	18.78	Yes	***	-23.23 to -13.19
EV-TPL vs ETT-TPR4 +NAA	-19.09	19.69	Yes	***	-24.11 to -14.07
EV-TPL +NAA vs EV-TPR2	-0.8822	0.91	No	ns	-5.906 to 4.141
EV-TPL +NAA vs EV-TPR2 +NAA	-0.5928	0.6114	No	ns	-5.616 to 4.431
EV-TPL +NAA vs EV-TPR4	-0.5165	0.5327	No	ns	-5.540 to 4.507
EV-TPL +NAA vs EV-TPR4 +NAA	-0.7393	0.7626	No	ns	-5.763 to 4.284
EV-TPL +NAA vs ETT-TPL	-20.95	21.61	Yes	***	-25.97 to -15.93
EV-TPL +NAA vs ETT-TPL +NAA	-20.81	21.46	Yes	***	-25.83 to -15.78
EV-TPL +NAA vs ETT-TPR2	-25.64	26.45	Yes	***	-30.66 to -20.62
EV-TPL +NAA vs ETT-TPR2 +NAA	-22.74	23.46	Yes	***	-27.77 to -17.72
EV-TPL +NAA vs ETT-TPR4	-17.92	18.48	Yes	***	-22.94 to -12.89
EV-TPL +NAA vs ETT-TPR4 +NAA	-18.8	19.39	Yes	***	-23.82 to -13.77
EV-TPR2 vs EV-TPR2 +NAA	0.2894	0.2986	No	ns	-4.734 to 5.313
EV-TPR2 vs EV-TPR4	0.3657	0.3773	No	ns	-4.658 to 5.389
EV-TPR2 vs EV-TPR4 +NAA	0.1429	0.1474	No	ns	-4.881 to 5.166
EV-TPR2 vs ETT-TPL	-20.07	20.7	Yes	***	-25.09 to -15.04
EV-TPR2 vs ETT-TPL +NAA	-19.92	20.55	Yes	***	-24.95 to -14.90
EV-TPR2 vs ETT-TPR2	-24.76	25.54	Yes	***	-29.78 to -19.73
EV-TPR2 vs ETT-TPR2 +NAA	-21.86	22.55	Yes	***	-26.88 to -16.84
EV-TPR2 vs ETT-TPR4	-17.03	17.57	Yes	***	-22.06 to -12.01
EV-TPR2 vs ETT-TPR4 +NAA	-17.91	18.48	Yes	***	-22.94 to -12.89
EV-TPR2 +NAA vs EV-TPR4	0.0763	0.0787	No	ns	-4.947 to 5.100
EV-TPR2 +NAA vs EV-TPR4 +NAA	-0.1466	0.1512	No	ns	-5.170 to 4.877
EV-TPR2 +NAA vs ETT-TPL	-20.36	21	Yes	***	-25.38 to -15.33
EV-TPR2 +NAA vs ETT-TPL +NAA	-20.21	20.85	Yes	***	-25.24 to -15.19
EV-TPR2 +NAA vs ETT-TPR2	-25.05	25.84	Yes	***	-30.07 to -20.02
EV-TPR2 +NAA vs ETT-TPR2 +NAA	-22.15	22.85	Yes	***	-27.17 to -17.13
EV-TPR2 +NAA vs ETT-TPR4	-17.32	17.87	Yes	***	-22.35 to -12.30
EV-TPR2 +NAA vs ETT-TPR4 +NAA	-18.2	18.78	Yes	***	-23.23 to -13.18
EV-TPR4 vs EV-TPR4 +NAA	-0.2229	0.2299	No	ns	-5.246 to 4.801
EV-TPR4 vs ETT-TPL	-20.43	21.08	Yes	***	-25.46 to -15.41
EV-TPR4 vs ETT-TPL +NAA	-20.29	20.93	Yes	***	-25.31 to -15.27
EV-TPR4 vs ETT-TPR2	-25.12	25.91	Yes	***	-30.15 to -20.10
EV-TPR4 vs ETT-TPR2 +NAA	-22.23	22.93	Yes	***	-27.25 to -17.20
EV-TPR4 vs ETT-TPR4	-17.4	17.95	Yes	***	-22.42 to -12.38
EV-TPR4 vs ETT-TPR4 +NAA	-18.28	18.86	Yes	***	-23.30 to -13.26
EV-TPR4 +NAA vs ETT-TPL	-20.21	20.85	Yes	***	-25.23 to -15.19
EV-TPR4 +NAA vs ETT-TPL +NAA	-20.07	20.7	Yes	***	-25.09 to -15.04
EV-TPR4 +NAA vs ETT-TPR2	-24.9	25.69	Yes	***	-29.92 to -19.88
EV-TPR4 +NAA vs ETT-TPR2 +NAA	-22	22.7	Yes	***	-27.03 to -16.98
EV-TPR4 +NAA vs ETT-TPR4	-17.18	17.72	Yes	***	-22.20 to -12.15
EV-TPR4 +NAA vs ETT-TPR4 +NAA	-18.06	18.63	Yes	***	-23.08 to -13.03
ETT-TPL vs ETT-TPL +NAA	0.1442	0.1487	No	ns	-4.879 to 5.168
ETT-TPL vs ETT-TPR2	-4.691	4.838	No	ns	-9.714 to 0.3329
ETT-TPL vs ETT-TPR2 +NAA	-1.792	1.849	No	ns	-6.816 to 3.231
ETT-TPL vs ETT-TPR4	3.034	3.13	No	ns	-1.989 to 8.058
ETT-TPL vs ETT-TPR4 +NAA	2.153	2.221	No	ns	-2.870 to 7.177
ETT-TPL +NAA vs ETT-TPR2	-4.835	4.987	No	ns	-9.858 to 0.1887
ETT-TPL +NAA vs ETT-TPR2 +NAA	-1.937	1.998	No	ns	-6.960 to 3.087
ETT-TPL +NAA vs ETT-TPR4	2.89	2.981	No	ns	-2.133 to 7.913
ETT-TPL +NAA vs ETT-TPR4 +NAA	2.009	2.072	No	ns	-3.014 to 7.032
ETT-TPR2 vs ETT-TPR2 +NAA	2.898	2.989	No	ns	-2.125 to 7.921
ETT-TPR2 vs ETT-TPR4	7.725	7.968	Yes	***	2.701 to 12.75
ETT-TPR2 vs ETT-TPR4 +NAA	6.844	7.059	Yes	**	1.820 to 11.87
ETT-TPR2 +NAA vs ETT-TPR4	4.827	4.979	No	ns	-0.1967 to 9.850
ETT-TPR2 +NAA vs ETT-TPR4 +NAA	3.946	4.07	No	ns	-1.078 to 8.969
ETT-TPR4 vs ETT-TPR4 +NAA	-0.881	0.9088	No	ns	-5.904 to 4.142
Table Analyzed	ONPG +IAA
One-way analysis of variance
P value	< 0.0001
P value summary	****
Are means signif. different? (P < 0.05)	Yes
Number of groups	14
F	54.07
R square	0.9617
ANOVA Table	SS	df	MS
Treatment (between columns)	4984	13	383.4
Residual (within columns)	198.5	28	7.09
Total	5182	41
Tukey's Multiple Comparison Test	Mean Diff.	q	Significant? P < 0.05?	Summary	95% CI of diff
ETT-EV vs ETT-EV +IAA	-1.033	0.6718	No	ns	-8.999 to 6.933
ETT-EV vs EV-TPL	0.01096	0.007131	No	ns	-7.955 to 7.977
ETT-EV vs EV-TPL +IAA	-0.1742	0.1133	No	ns	-8.140 to 7.792
ETT-EV vs EV-TPR2	-0.03753	0.02441	No	ns	-8.004 to 7.928
ETT-EV vs EV-TPR2 +IAA	-0.4997	0.3251	No	ns	-8.466 to 7.466
ETT-EV vs EV-TPR4	-0.8844	0.5753	No	ns	-8.850 to 7.082
ETT-EV vs EV-TPR4 +IAA	-1.172	0.762	No	ns	-9.138 to 6.794
ETT-EV vs ETT-TPL	-26.93	17.51	Yes	***	-34.89 to -18.96
ETT-EV vs ETT-TPL +IAA	-6.489	4.221	No	ns	-14.46 to 1.477
ETT-EV vs ETT-TPR2	-30.63	19.92	Yes	***	-38.59 to -22.66
ETT-EV vs ETT-TPR2 +IAA	-4.925	3.203	No	ns	-12.89 to 3.041
ETT-EV vs ETT-TPR4	-26.04	16.94	Yes	***	-34.00 to -18.07
ETT-EV vs ETT-TPR4 +IAA	-6.495	4.225	No	ns	-14.46 to 1.471
ETT-EV +IAA vs EV-TPL	1.044	0.679	No	ns	-6.922 to 9.010
ETT-EV +IAA vs EV-TPL +IAA	0.8586	0.5585	No	ns	-7.107 to 8.825
ETT-EV +IAA vs EV-TPR2	0.9953	0.6474	No	ns	-6.971 to 8.961
ETT-EV +IAA vs EV-TPR2 +IAA	0.5331	0.3468	No	ns	-7.433 to 8.499
ETT-EV +IAA vs EV-TPR4	0.1484	0.09656	No	ns	-7.818 to 8.114
ETT-EV +IAA vs EV-TPR4 +IAA	-0.1387	0.0902	No	ns	-8.105 to 7.827
ETT-EV +IAA vs ETT-TPL	-25.89	16.84	Yes	***	-33.86 to -17.93
ETT-EV +IAA vs ETT-TPL +IAA	-5.456	3.549	No	ns	-13.42 to 2.510
ETT-EV +IAA vs ETT-TPR2	-29.6	19.25	Yes	***	-37.56 to -21.63
ETT-EV +IAA vs ETT-TPR2 +IAA	-3.892	2.532	No	ns	-11.86 to 4.074
ETT-EV +IAA vs ETT-TPR4	-25.01	16.27	Yes	***	-32.97 to -17.04
ETT-EV +IAA vs ETT-TPR4 +IAA	-5.462	3.553	No	ns	-13.43 to 2.504
EV-TPL vs EV-TPL +IAA	-0.1852	0.1205	No	ns	-8.151 to 7.781
EV-TPL vs EV-TPR2	-0.04849	0.03154	No	ns	-8.014 to 7.918
EV-TPL vs EV-TPR2 +IAA	-0.5107	0.3322	No	ns	-8.477 to 7.455
EV-TPL vs EV-TPR4	-0.8954	0.5824	No	ns	-8.861 to 7.071
EV-TPL vs EV-TPR4 +IAA	-1.182	0.7692	No	ns	-9.148 to 6.784
EV-TPL vs ETT-TPL	-26.94	17.52	Yes	***	-34.90 to -18.97
EV-TPL vs ETT-TPL +IAA	-6.5	4.228	No	ns	-14.47 to 1.466
EV-TPL vs ETT-TPR2	-30.64	19.93	Yes	***	-38.61 to -22.67
EV-TPL vs ETT-TPR2 +IAA	-4.936	3.211	No	ns	-12.90 to 3.030
EV-TPL vs ETT-TPR4	-26.05	16.94	Yes	***	-34.02 to -18.08
EV-TPL vs ETT-TPR4 +IAA	-6.506	4.232	No	ns	-14.47 to 1.460
EV-TPL +IAA vs EV-TPR2	0.1367	0.08891	No	ns	-7.829 to 8.103
EV-TPL +IAA vs EV-TPR2 +IAA	-0.3255	0.2117	No	ns	-8.292 to 7.641
EV-TPL +IAA vs EV-TPR4	-0.7102	0.462	No	ns	-8.676 to 7.256
EV-TPL +IAA vs EV-TPR4 +IAA	-0.9973	0.6487	No	ns	-8.963 to 6.969
EV-TPL +IAA vs ETT-TPL	-26.75	17.4	Yes	***	-34.72 to -18.79
EV-TPL +IAA vs ETT-TPL +IAA	-6.315	4.108	No	ns	-14.28 to 1.651
EV-TPL +IAA vs ETT-TPR2	-30.45	19.81	Yes	***	-38.42 to -22.49
EV-TPL +IAA vs ETT-TPR2 +IAA	-4.751	3.09	No	ns	-12.72 to 3.215
EV-TPL +IAA vs ETT-TPR4	-25.86	16.82	Yes	***	-33.83 to -17.90
EV-TPL +IAA vs ETT-TPR4 +IAA	-6.321	4.112	No	ns	-14.29 to 1.645
EV-TPR2 vs EV-TPR2 +IAA	-0.4622	0.3006	No	ns	-8.428 to 7.504
EV-TPR2 vs EV-TPR4	-0.8469	0.5509	No	ns	-8.813 to 7.119
EV-TPR2 vs EV-TPR4 +IAA	-1.134	0.7376	No	ns	-9.100 to 6.832
EV-TPR2 vs ETT-TPL	-26.89	17.49	Yes	***	-34.85 to -18.92
EV-TPR2 vs ETT-TPL +IAA	-6.452	4.197	No	ns	-14.42 to 1.514
EV-TPR2 vs ETT-TPR2	-30.59	19.9	Yes	***	-38.56 to -22.63
EV-TPR2 vs ETT-TPR2 +IAA	-4.887	3.179	No	ns	-12.85 to 3.079
EV-TPR2 vs ETT-TPR4	-26	16.91	Yes	***	-33.97 to -18.03
EV-TPR2 vs ETT-TPR4 +IAA	-6.458	4.201	No	ns	-14.42 to 1.508
EV-TPR2 +IAA vs EV-TPR4	-0.3847	0.2502	No	ns	-8.351 to 7.581
EV-TPR2 +IAA vs EV-TPR4 +IAA	-0.6718	0.437	No	ns	-8.638 to 7.294
EV-TPR2 +IAA vs ETT-TPL	-26.43	17.19	Yes	***	-34.39 to -18.46
EV-TPR2 +IAA vs ETT-TPL +IAA	-5.989	3.896	No	ns	-13.96 to 1.977
EV-TPR2 +IAA vs ETT-TPR2	-30.13	19.6	Yes	***	-38.09 to -22.16
EV-TPR2 +IAA vs ETT-TPR2 +IAA	-4.425	2.878	No	ns	-12.39 to 3.541
EV-TPR2 +IAA vs ETT-TPR4	-25.54	16.61	Yes	***	-33.50 to -17.57
EV-TPR2 +IAA vs ETT-TPR4 +IAA	-5.995	3.9	No	ns	-13.96 to 1.971
EV-TPR4 vs EV-TPR4 +IAA	-0.2871	0.1868	No	ns	-8.253 to 7.679
EV-TPR4 vs ETT-TPL	-26.04	16.94	Yes	***	-34.01 to -18.08
EV-TPR4 vs ETT-TPL +IAA	-5.605	3.646	No	ns	-13.57 to 2.361
EV-TPR4 vs ETT-TPR2	-29.74	19.35	Yes	***	-37.71 to -21.78
EV-TPR4 vs ETT-TPR2 +IAA	-4.04	2.628	No	ns	-12.01 to 3.926
EV-TPR4 vs ETT-TPR4	-25.15	16.36	Yes	***	-33.12 to -17.19
EV-TPR4 vs ETT-TPR4 +IAA	-5.611	3.65	No	ns	-13.58 to 2.355
EV-TPR4 +IAA vs ETT-TPL	-25.75	16.75	Yes	***	-33.72 to -17.79
EV-TPR4 +IAA vs ETT-TPL +IAA	-5.318	3.459	No	ns	-13.28 to 2.648
EV-TPR4 +IAA vs ETT-TPR2	-29.46	19.16	Yes	***	-37.42 to -21.49
EV-TPR4 +IAA vs ETT-TPR2 +IAA	-3.753	2.441	No	ns	-11.72 to 4.213
EV-TPR4 +IAA vs ETT-TPR4	-24.87	16.18	Yes	***	-32.83 to -16.90
EV-TPR4 +IAA vs ETT-TPR4 +IAA	-5.324	3.463	No	ns	-13.29 to 2.642
ETT-TPL vs ETT-TPL +IAA	20.44	13.29	Yes	***	12.47 to 28.40
ETT-TPL vs ETT-TPR2	-3.702	2.408	No	ns	-11.67 to 4.264
ETT-TPL vs ETT-TPR2 +IAA	22	14.31	Yes	***	14.04 to 29.97
ETT-TPL vs ETT-TPR4	0.8881	0.5777	No	ns	-7.078 to 8.854
ETT-TPL vs ETT-TPR4 +IAA	20.43	13.29	Yes	***	12.47 to 28.40
ETT-TPL +IAA vs ETT-TPR2	-24.14	15.7	Yes	***	-32.11 to -16.17
ETT-TPL +IAA vs ETT-TPR2 +IAA	1.564	1.017	No	ns	-6.402 to 9.530
ETT-TPL +IAA vs ETT-TPR4	-19.55	12.72	Yes	***	-27.52 to -11.58
ETT-TPL +IAA vs ETT-TPR4 +IAA	-0.006134	0.00399	No	ns	-7.972 to 7.960
ETT-TPR2 vs ETT-TPR2 +IAA	25.7	16.72	Yes	***	17.74 to 33.67
ETT-TPR2 vs ETT-TPR4	4.59	2.986	No	ns	-3.376 to 12.56
ETT-TPR2 vs ETT-TPR4 +IAA	24.13	15.7	Yes	***	16.17 to 32.10
ETT-TPR2 +IAA vs ETT-TPR4	-21.11	13.73	Yes	***	-29.08 to -13.15
ETT-TPR2 +IAA vs ETT-TPR4 +IAA	-1.57	1.021	No	ns	-9.536 to 6.396
ETT-TPR4 vs ETT-TPR4 +IAA	19.54	12.71	Yes	***	11.58 to 27.51
