# Supplementary material for: Direct ETTIN-auxin interaction controls chromatin states in gynoecium development
Source: eLife. 2020 Apr 8;9:e51787. doi: 10.7554/eLife.51787 (PMC7164952; doi:10.7554/eLife.51787)
Supplement: Figure 4—source data 1. [file elife-51787-fig4-data1.xlsx]

## Sheet: Sheet1
Figure 4-source data 1. Output of statistical tests
Table Analyzed	Figure 4i
One-way analysis of variance
P value	< 0.0001
P value summary	****
Are means signif. different? (P < 0.05)	Yes
Number of groups	8
F	37.61
R square	0.8681
Bartlett's test for equal variances
Bartlett's statistic (corrected)	9.801
P value	0.2001
P value summary	ns
Do the variances differ signif. (P < 0.05)	No
ANOVA Table	SS	df	MS
Treatment (between columns)	48.01	7	6.858
Residual (within columns)	7.294	40	0.1823
Total	55.3	47
Tukey's Multiple Comparison Test	Mean Diff.	q	Significant? P < 0.05?	Summary	95% CI of diff
Col-0 vs Col-0+IAA	-1.922	11.02	Yes	***	-2.710 to -1.134
Col-0 vs ett-3	-2.906	16.67	Yes	***	-3.694 to -2.118
Col-0 vs ett-3 +IAA	-3.274	18.78	Yes	***	-4.062 to -2.486
Col-0 vs tpltpr2	-1.093	6.267	Yes	**	-1.881 to -0.3044
Col-0 vs tpltpr2+IAA	-1.949	11.18	Yes	***	-2.737 to -1.161
Col-0 vs hda19-4	-1.019	5.843	Yes	**	-1.807 to -0.2304
Col-0 vs hda19-4+IAA	-2.267	13	Yes	***	-3.055 to -1.478
Col-0+IAA vs ett-3	-0.9844	5.647	Yes	**	-1.773 to -0.1962
Col-0+IAA vs ett-3 +IAA	-1.352	7.756	Yes	***	-2.140 to -0.5639
Col-0+IAA vs tpltpr2	0.8291	4.756	Yes	*	0.04099 to 1.617
Col-0+IAA vs tpltpr2+IAA	-0.02748	0.1576	No	ns	-0.8156 to 0.7607
Col-0+IAA vs hda19-4	0.9031	5.181	Yes	*	0.1150 to 1.691
Col-0+IAA vs hda19-4+IAA	-0.3448	1.978	No	ns	-1.133 to 0.4433
ett-3 vs ett-3 +IAA	-0.3677	2.109	No	ns	-1.156 to 0.4205
ett-3 vs tpltpr2	1.814	10.4	Yes	***	1.025 to 2.602
ett-3 vs tpltpr2+IAA	0.9569	5.489	Yes	**	0.1688 to 1.745
ett-3 vs hda19-4	1.888	10.83	Yes	***	1.099 to 2.676
ett-3 vs hda19-4+IAA	0.6396	3.669	No	ns	-0.1486 to 1.428
ett-3 +IAA vs tpltpr2	2.181	12.51	Yes	***	1.393 to 2.969
ett-3 +IAA vs tpltpr2+IAA	1.325	7.598	Yes	***	0.5364 to 2.113
ett-3 +IAA vs hda19-4	2.255	12.94	Yes	***	1.467 to 3.043
ett-3 +IAA vs hda19-4+IAA	1.007	5.778	Yes	**	0.2191 to 1.795
tpltpr2 vs tpltpr2+IAA	-0.8566	4.914	Yes	*	-1.645 to -0.06847
tpltpr2 vs hda19-4	0.07401	0.4245	No	ns	-0.7141 to 0.8622
tpltpr2 vs hda19-4+IAA	-1.174	6.734	Yes	***	-1.962 to -0.3858
tpltpr2+IAA vs hda19-4	0.9306	5.338	Yes	*	0.1425 to 1.719
tpltpr2+IAA vs hda19-4+IAA	-0.3173	1.82	No	ns	-1.105 to 0.4708
hda19-4 vs hda19-4+IAA	-1.248	7.159	Yes	***	-2.036 to -0.4598
Table Analyzed	Figure 4j
One-way analysis of variance
P value	0.0003
P value summary	***
Are means signif. different? (P < 0.05)	Yes
Number of groups	8
F	5.232
R square	0.478
Bartlett's test for equal variances
Bartlett's statistic (corrected)	11.38
P value	0.1229
P value summary	ns
Do the variances differ signif. (P < 0.05)	No
ANOVA Table	SS	df	MS
Treatment (between columns)	4.036	7	0.5766
Residual (within columns)	4.408	40	0.1102
Total	8.444	47
Tukey's Multiple Comparison Test	Mean Diff.	q	Significant? P < 0.05?	Summary	95% CI of diff
Col-0 vs Col-0+IAA	-0.8574	6.327	Yes	**	-1.470 to -0.2447
Col-0 vs ett-3	-0.7946	5.863	Yes	**	-1.407 to -0.1819
Col-0 vs ett-3 +IAA	-0.8344	6.157	Yes	**	-1.447 to -0.2217
Col-0 vs tpltpr2	-0.7445	5.494	Yes	**	-1.357 to -0.1318
Col-0 vs tpltpr2+IAA	-0.7796	5.752	Yes	**	-1.392 to -0.1669
Col-0 vs hda19-4	-0.7558	5.577	Yes	**	-1.369 to -0.1431
Col-0 vs hda19-4+IAA	-1.054	7.779	Yes	***	-1.667 to -0.4416
Col-0+IAA vs ett-3	0.06279	0.4633	No	ns	-0.5499 to 0.6755
Col-0+IAA vs ett-3 +IAA	0.02302	0.1698	No	ns	-0.5897 to 0.6357
Col-0+IAA vs tpltpr2	0.1129	0.8328	No	ns	-0.4998 to 0.7256
Col-0+IAA vs tpltpr2+IAA	0.07784	0.5744	No	ns	-0.5349 to 0.6906
Col-0+IAA vs hda19-4	0.1016	0.7496	No	ns	-0.5111 to 0.7143
Col-0+IAA vs hda19-4+IAA	-0.1968	1.452	No	ns	-0.8096 to 0.4159
ett-3 vs ett-3 +IAA	-0.03978	0.2935	No	ns	-0.6525 to 0.5729
ett-3 vs tpltpr2	0.05007	0.3695	No	ns	-0.5626 to 0.6628
ett-3 vs tpltpr2+IAA	0.01505	0.1111	No	ns	-0.5977 to 0.6278
ett-3 vs hda19-4	0.03879	0.2862	No	ns	-0.5739 to 0.6515
ett-3 vs hda19-4+IAA	-0.2596	1.916	No	ns	-0.8724 to 0.3531
ett-3 +IAA vs tpltpr2	0.08985	0.663	No	ns	-0.5229 to 0.7026
ett-3 +IAA vs tpltpr2+IAA	0.05483	0.4046	No	ns	-0.5579 to 0.6675
ett-3 +IAA vs hda19-4	0.07857	0.5798	No	ns	-0.5341 to 0.6913
ett-3 +IAA vs hda19-4+IAA	-0.2199	1.622	No	ns	-0.8326 to 0.3929
tpltpr2 vs tpltpr2+IAA	-0.03502	0.2584	No	ns	-0.6477 to 0.5777
tpltpr2 vs hda19-4	-0.01128	0.08324	No	ns	-0.6240 to 0.6014
tpltpr2 vs hda19-4+IAA	-0.3097	2.285	No	ns	-0.9224 to 0.3030
tpltpr2+IAA vs hda19-4	0.02374	0.1752	No	ns	-0.5890 to 0.6365
tpltpr2+IAA vs hda19-4+IAA	-0.2747	2.027	No	ns	-0.8874 to 0.3380
hda19-4 vs hda19-4+IAA	-0.2984	2.202	No	ns	-0.9111 to 0.3143
Table Analyzed	Figure 4-figure supplement 1
One-way analysis of variance
P value	< 0.0001
P value summary	****
Are means signif. different? (P < 0.05)	Yes
Number of groups	5
F	207.8
R square	0.9823
ANOVA Table	SS	df	MS
Treatment (between columns)	0.01859	4	0.004647
Residual (within columns)	0.0003355	15	2.236e-05
Total	0.01892	19
Tukey's Multiple Comparison Test	Mean Diff.	q	Significant? P < 0.05?	Summary	95% CI of diff
TPL vs TPR1	0.06718	28.41	Yes	***	0.05685 to 0.07750
TPL vs TPR2	0.001633	0.6907	No	ns	-0.008693 to 0.01196
TPL vs TPR3	0.06066	25.65	Yes	***	0.05033 to 0.07098
TPL vs TPR4	0.06071	25.68	Yes	***	0.05038 to 0.07104
TPR1 vs TPR2	-0.06554	27.72	Yes	***	-0.07587 to -0.05522
TPR1 vs TPR3	-0.006521	2.758	No	ns	-0.01685 to 0.003805
TPR1 vs TPR4	-0.006466	2.735	No	ns	-0.01679 to 0.003859
TPR2 vs TPR3	0.05902	24.96	Yes	***	0.04870 to 0.06935
TPR2 vs TPR4	0.05908	24.98	Yes	***	0.04875 to 0.06940
TPR3 vs TPR4	5.475e-05	0.02316	No	ns	-0.01027 to 0.01038
Table Analyzed	Figure 4-figure supplement 1
Column A	HDA6
vs	vs
Column B	HDA19
Unpaired t test with Welch's correction
P value	0.0039
P value summary	**
Are means signif. different? (P < 0.05)	Yes
One- or two-tailed P value?	Two-tailed
Welch-corrected t, df	t=5.052 df=5
How big is the difference?
Mean ± SEM of column A	0.006864 ± 0.001296 N=6
Mean ± SEM of column B	0.08670 ± 0.01575 N=6
Difference between means	-0.07984 ± 0.01580
95% confidence interval	-0.1205 to -0.03920
R square	0.8362
F test to compare variances
F,DFn, Dfd	147.8, 5, 5
P value	< 0.0001
P value summary	****
Are variances significantly different?	Yes
