# Supplementary material for: Direct ETTIN-auxin interaction controls chromatin states in gynoecium development
Source: eLife. 2020 Apr 8;9:e51787. doi: 10.7554/eLife.51787 (PMC7164952; doi:10.7554/eLife.51787)
Supplement: Figure 5—source data 1. [file elife-51787-fig5-data1.xlsx]

## Sheet: Sheet2
Figure 5a
Table Analyzed	ETT -IAA						Table Analyzed	ETT +IAA						Table Analyzed	ETT		Table Analyzed	ETT		Table Analyzed	ETT
														Column A	NC -auxin		Column C	HEC1 - auxin		Column E	PID -auxin
One-way analysis of variance							One-way analysis of variance							vs	vs		vs	vs		vs	vs
P value	0.0003						P value	< 0.0001						Column B	NC +auxin		Column D	HEC1 +auxin		Column F	PID +auxin
P value summary	***						P value summary	****
Are means signif. different? (P < 0.05)	Yes						Are means signif. different? (P < 0.05)	Yes						Unpaired t test			Unpaired t test			Unpaired t test
Number of groups	3						Number of groups	3						P value	0.1801		P value	0.0643		P value	0.8301
F	41						F	125.5						P value summary	ns		P value summary	ns		P value summary	ns
R square	0.9318						R square	0.9654						Are means signif. different? (P < 0.05)	No		Are means signif. different? (P < 0.05)	No		Are means signif. different? (P < 0.05)	No
														One- or two-tailed P value?	Two-tailed		One- or two-tailed P value?	Two-tailed		One- or two-tailed P value?	Two-tailed
ANOVA Table	SS	df	MS				ANOVA Table	SS	df	MS				t, df	t=1.557 df=5		t, df	t=2.365 df=5		t, df	t=0.2261 df=5
Treatment (between columns)	0.003029	2	0.001515				Treatment (between columns)	0.005502	2	0.002751
Residual (within columns)	0.0002217	6	3.695e-05				Residual (within columns)	0.0001972	9	2.191e-05				How big is the difference?			How big is the difference?			How big is the difference?
Total	0.003251	8					Total	0.0057	11					Mean ± SEM of column A	0.003913 ± 0.0003835 N=3		Mean ± SEM of column C	0.04123 ± 0.005149 N=3		Mean ± SEM of column E	0.04426 ± 0.003207 N=3
														Mean ± SEM of column B	0.005739 ± 0.0009531 N=4		Mean ± SEM of column D	0.05549 ± 0.003561 N=4		Mean ± SEM of column F	0.04501 ± 0.001688 N=4
Tukey's Multiple Comparison Test	Mean Diff.	q	Significant? P < 0.05?	Summary	95% CI of diff		Tukey's Multiple Comparison Test	Mean Diff.	q	Significant? P < 0.05?	Summary	95% CI of diff		Difference between means	-0.001826 ± 0.001172		Difference between means	-0.01425 ± 0.006026		Difference between means	-0.0007561 ± 0.003344
NC -auxin vs HEC1 - auxin	-0.03732	10.63	Yes	***	-0.05255 to -0.02209		NC +auxin vs HEC1 +auxin	-0.04975	21.25	Yes	***	-0.05899 to -0.04050		95% confidence interval	-0.004840 to 0.001189		95% confidence interval	-0.02975 to 0.001240		95% confidence interval	-0.009355 to 0.007843
NC -auxin vs PID -auxin	-0.04034	11.5	Yes	***	-0.05557 to -0.02512		NC +auxin vs PID +auxin	-0.03927	16.78	Yes	***	-0.04852 to -0.03003		R square	0.3266		R square	0.528		R square	0.01012
HEC1 - auxin vs PID -auxin	-0.003022	0.8611	No	ns	-0.01825 to 0.01221		HEC1 +auxin vs PID +auxin	0.01047	4.475	Yes	*	0.001231 to 0.01972
														F test to compare variances			F test to compare variances			F test to compare variances
														F,DFn, Dfd	8.234, 3, 2		F,DFn, Dfd	1.568, 2, 3		F,DFn, Dfd	2.708, 2, 3
														P value	0.2204		P value	0.6836		P value	0.4257
														P value summary	ns		P value summary	ns		P value summary	ns
														Are variances significantly different?	No		Are variances significantly different?	No		Are variances significantly different?	No
Figure 5b
Table Analyzed	TPL -IAA						Table Analyzed	TPL +IAA						Table Analyzed	TPL		Table Analyzed	TPL		Table Analyzed	TPL
														Column A	NC -auxin		Column C	HEC1 - auxin		Column E	PID -auxin
One-way analysis of variance							One-way analysis of variance							vs	vs		vs	vs		vs	vs
P value	0.0002						P value	0.0008						Column B	NC +auxin		Column D	HEC1 +auxin		Column F	PID +auxin
P value summary	***						P value summary	***
Are means signif. different? (P < 0.05)	Yes						Are means signif. different? (P < 0.05)	Yes						Unpaired t test			Unpaired t test			Unpaired t test
Number of groups	3						Number of groups	3						P value	0.1257		P value	0.0008		P value	0.0004
F	49.12						F	17.17						P value summary	ns		P value summary	***		P value summary	***
R square	0.9424						R square	0.7924						Are means signif. different? (P < 0.05)	No		Are means signif. different? (P < 0.05)	Yes		Are means signif. different? (P < 0.05)	Yes
														One- or two-tailed P value?	Two-tailed		One- or two-tailed P value?	Two-tailed		One- or two-tailed P value?	Two-tailed
ANOVA Table	SS	df	MS				ANOVA Table	SS	df	MS				t, df	t=1.837 df=5		t, df	t=7.170 df=5		t, df	t=8.220 df=5
Treatment (between columns)	0.005173	2	0.002586				Treatment (between columns)	0.0003335	2	0.0001667
Residual (within columns)	0.0003159	6	5.265e-05				Residual (within columns)	8.738e-05	9	9.708e-06				How big is the difference?			How big is the difference?			How big is the difference?
Total	0.005489	8					Total	0.0004208	11					Mean ± SEM of column A	0.004405 ± 8.603e-005 N=3		Mean ± SEM of column C	0.06308 ± 0.006961 N=3		Mean ± SEM of column E	0.03575 ± 0.002048 N=3
														Mean ± SEM of column B	0.006169 ± 0.0008096 N=4		Mean ± SEM of column D	0.01905 ± 0.001645 N=4		Mean ± SEM of column F	0.01190 ± 0.001980 N=4
Tukey's Multiple Comparison Test	Mean Diff.	q	Significant? P < 0.05?	Summary	95% CI of diff		Tukey's Multiple Comparison Test	Mean Diff.	q	Significant? P < 0.05?	Summary	95% CI of diff		Difference between means	-0.001764 ± 0.0009607		Difference between means	0.04403 ± 0.006140		Difference between means	0.02386 ± 0.002902
NC -auxin vs HEC1 - auxin	-0.05868	14.01	Yes	***	-0.07686 to -0.04050		NC +auxin vs HEC1 +auxin	-0.01289	8.271	Yes	***	-0.01904 to -0.006734		95% confidence interval	-0.004234 to 0.0007056		95% confidence interval	0.02824 to 0.05982		95% confidence interval	0.01640 to 0.03132
NC -auxin vs PID -auxin	-0.03135	7.483	Yes	**	-0.04953 to -0.01317		NC +auxin vs PID +auxin	-0.005726	3.675	No	ns	-0.01188 to 0.0004262		R square	0.4028		R square	0.9114		R square	0.9311
HEC1 - auxin vs PID -auxin	0.02733	6.524	Yes	**	0.009152 to 0.04551		HEC1 +auxin vs PID +auxin	0.00716	4.596	Yes	*	0.001008 to 0.01331
														F test to compare variances			F test to compare variances			F test to compare variances
														F,DFn, Dfd	118.1, 3, 2		F,DFn, Dfd	13.43, 2, 3		F,DFn, Dfd	1.247, 3, 2
														P value	0.0168		P value	0.0637		P value	0.948
														P value summary	*		P value summary	ns		P value summary	ns
														Are variances significantly different?	Yes		Are variances significantly different?	No		Are variances significantly different?	No
Figure 5c
Table Analyzed	HDA19 -IAA						Table Analyzed	HDA19 +IAA						Table Analyzed	HDA19		Table Analyzed	HDA19		Table Analyzed	HDA19
														Column A	NC -auxin		Column C	HEC1 - auxin		Column E	PID -auxin
One-way analysis of variance							One-way analysis of variance							vs	vs		vs	vs		vs	vs
P value	< 0.0001						P value	0.0345						Column B	NC +auxin		Column D	HEC1 +auxin		Column F	PID +auxin
P value summary	****						P value summary	*
Are means signif. different? (P < 0.05)	Yes						Are means signif. different? (P < 0.05)	Yes						Unpaired t test			Unpaired t test			Unpaired t test
Number of groups	3						Number of groups	3						P value	0.2982		P value	0.0012		P value	0.0006
F	175.7						F	5.008						P value summary	ns		P value summary	**		P value summary	***
R square	0.9832						R square	0.5267						Are means signif. different? (P < 0.05)	No		Are means signif. different? (P < 0.05)	Yes		Are means signif. different? (P < 0.05)	Yes
														One- or two-tailed P value?	Two-tailed		One- or two-tailed P value?	Two-tailed		One- or two-tailed P value?	Two-tailed
ANOVA Table	SS	df	MS				ANOVA Table	SS	df	MS				t, df	t=1.161 df=5		t, df	t=6.637 df=5		t, df	t=7.807 df=5
Treatment (between columns)	0.001208	2	0.0006041				Treatment (between columns)	9.999e-05	2	5e-05
Residual (within columns)	2.064e-05	6	3.439e-06				Residual (within columns)	8.985e-05	9	9.983e-06				How big is the difference?			How big is the difference?			How big is the difference?
Total	0.001229	8					Total	0.0001898	11					Mean ± SEM of column A	0.003257 ± 0.0004843 N=3		Mean ± SEM of column C	0.02455 ± 0.001390 N=3		Mean ± SEM of column E	0.03016 ± 0.001128 N=3
														Mean ± SEM of column B	0.005334 ± 0.001473 N=4		Mean ± SEM of column D	0.01182 ± 0.001289 N=4		Mean ± SEM of column F	0.01102 ± 0.001912 N=4
Tukey's Multiple Comparison Test	Mean Diff.	q	Significant? P < 0.05?	Summary	95% CI of diff		Tukey's Multiple Comparison Test	Mean Diff.	q	Significant? P < 0.05?	Summary	95% CI of diff		Difference between means	-0.002077 ± 0.001789		Difference between means	0.01273 ± 0.001918		Difference between means	0.01914 ± 0.002452
NC -auxin vs HEC1 - auxin	-0.02129	19.88	Yes	***	-0.02594 to -0.01664		NC +auxin vs HEC1 +auxin	-0.006485	4.105	Yes	*	-0.01272 to -0.0002466		95% confidence interval	-0.006678 to 0.002524		95% confidence interval	0.007798 to 0.01766		95% confidence interval	0.01284 to 0.02544
NC -auxin vs PID -auxin	-0.0269	25.12	Yes	***	-0.03154 to -0.02225		NC +auxin vs PID +auxin	-0.005683	3.597	No	ns	-0.01192 to 0.0005561		R square	0.2123		R square	0.8981		R square	0.9242
HEC1 - auxin vs PID -auxin	-0.005609	5.239	Yes	*	-0.01025 to -0.0009632		HEC1 +auxin vs PID +auxin	0.0008027	0.5081	No	ns	-0.005436 to 0.007041
														F test to compare variances			F test to compare variances			F test to compare variances
														F,DFn, Dfd	12.33, 3, 2		F,DFn, Dfd	1.146, 3, 2		F,DFn, Dfd	3.829, 3, 2
														P value	0.1518		P value	0.9944		P value	0.4279
														P value summary	ns		P value summary	ns		P value summary	ns
														Are variances significantly different?	No		Are variances significantly different?	No		Are variances significantly different?	No
Figure 5d
Parameter
Table Analyzed	ChIP H3K27Ac-HEC1
Two-way ANOVA
Source of Variation	% of total variation	P value
Interaction	16.93	< 0.0001
Column Factor	12.8	< 0.0001
Row Factor	63.65	< 0.0001
Source of Variation	P value summary	Significant?
Interaction	****	Yes
Column Factor	****	Yes
Row Factor	****	Yes
Source of Variation	Df	Sum-of-squares	Mean square	F
Interaction	18	3.18	0.176	7.96
Column Factor	3	2.4	0.8	36.1
Row Factor	6	11.9	1.99	89.8
Residual	56	1.24	0.0222
Number of missing values	0
Bonferroni multiple comparisons	Number of comparisons: 42
Col-0 vs Col-0 +IAA
Row Factor	Col-0	Col-0 +IAA	Difference	95% CI of diff.
HEC1 A	0.206	0.148	-0.0588	-0.474 to 0.356
HEC1 B	0.295	1.44	1.15	0.732 to 1.56
HEC1 C	0.29	0.7	0.41	-0.00521 to 0.825
HEC1 D	0.655	0.865	0.21	-0.205 to 0.625
HEC1 E	0.192	0.303	0.111	-0.304 to 0.527
HEC1 F	0.12	0.192	0.0723	-0.343 to 0.488
HEC1 G	0.169	0.271	0.101	-0.314 to 0.517
Row Factor	Difference	t	P value	Summary
HEC1 A	-0.0588	0.484	P > 0.05	ns
HEC1 B	1.15	9.43	P < 0.0001	****
HEC1 C	0.41	3.37	P > 0.05	ns
HEC1 D	0.21	1.73	P > 0.05	ns
HEC1 E	0.111	0.917	P > 0.05	ns
HEC1 F	0.0723	0.595	P > 0.05	ns
HEC1 G	0.101	0.834	P > 0.05	ns
Col-0 vs ett-3
Row Factor	Col-0	ett-3	Difference	95% CI of diff.
HEC1 A	0.206	0.158	-0.048	-0.463 to 0.367
HEC1 B	0.295	1.86	1.56	1.15 to 1.98
HEC1 C	0.29	1.11	0.816	0.401 to 1.23
HEC1 D	0.655	0.914	0.26	-0.156 to 0.675
HEC1 E	0.192	0.556	0.364	-0.0514 to 0.779
HEC1 F	0.12	0.271	0.151	-0.264 to 0.566
HEC1 G	0.169	0.296	0.126	-0.289 to 0.542
Row Factor	Difference	t	P value	Summary
HEC1 A	-0.048	0.395	P > 0.05	ns
HEC1 B	1.56	12.9	P < 0.0001	****
HEC1 C	0.816	6.72	P < 0.0001	****
HEC1 D	0.26	2.14	P > 0.05	ns
HEC1 E	0.364	2.99	P > 0.05	ns
HEC1 F	0.151	1.24	P > 0.05	ns
HEC1 G	0.126	1.04	P > 0.05	ns
Col-0 vs ett-3 +IAA
Row Factor	Col-0	ett-3 +IAA	Difference	95% CI of diff.
HEC1 A	0.206	0.17	-0.0361	-0.451 to 0.379
HEC1 B	0.295	1.5	1.2	0.789 to 1.62
HEC1 C	0.29	0.735	0.445	0.0299 to 0.860
HEC1 D	0.655	0.87	0.215	-0.200 to 0.630
HEC1 E	0.192	0.387	0.195	-0.220 to 0.610
HEC1 F	0.12	0.305	0.185	-0.230 to 0.601
HEC1 G	0.169	0.318	0.148	-0.267 to 0.564
Row Factor	Difference	t	P value	Summary
HEC1 A	-0.0361	0.297	P > 0.05	ns
HEC1 B	1.2	9.91	P < 0.0001	****
HEC1 C	0.445	3.66	P < 0.05	*
HEC1 D	0.215	1.77	P > 0.05	ns
HEC1 E	0.195	1.6	P > 0.05	ns
HEC1 F	0.185	1.53	P > 0.05	ns
HEC1 G	0.148	1.22	P > 0.05	ns
Col-0 +IAA vs ett-3
Row Factor	Col-0 +IAA	ett-3	Difference	95% CI of diff.
HEC1 A	0.148	0.158	0.0108	-0.404 to 0.426
HEC1 B	1.44	1.86	0.416	0.000872 to 0.831
HEC1 C	0.7	1.11	0.406	-0.00888 to 0.821
HEC1 D	0.865	0.914	0.0496	-0.366 to 0.465
HEC1 E	0.303	0.556	0.252	-0.163 to 0.668
HEC1 F	0.192	0.271	0.079	-0.336 to 0.494
HEC1 G	0.271	0.296	0.0252	-0.390 to 0.440
Row Factor	Difference	t	P value	Summary
HEC1 A	0.0108	0.0891	P > 0.05	ns
HEC1 B	0.416	3.42	P < 0.05	*
HEC1 C	0.406	3.34	P > 0.05	ns
HEC1 D	0.0496	0.408	P > 0.05	ns
HEC1 E	0.252	2.08	P > 0.05	ns
HEC1 F	0.079	0.65	P > 0.05	ns
HEC1 G	0.0252	0.207	P > 0.05	ns
Col-0 +IAA vs ett-3 +IAA
Row Factor	Col-0 +IAA	ett-3 +IAA	Difference	95% CI of diff.
HEC1 A	0.148	0.17	0.0227	-0.392 to 0.438
HEC1 B	1.44	1.5	0.0575	-0.358 to 0.473
HEC1 C	0.7	0.735	0.0351	-0.380 to 0.450
HEC1 D	0.865	0.87	0.00501	-0.410 to 0.420
HEC1 E	0.303	0.387	0.0835	-0.332 to 0.499
HEC1 F	0.192	0.305	0.113	-0.302 to 0.528
HEC1 G	0.271	0.318	0.047	-0.368 to 0.462
Row Factor	Difference	t	P value	Summary
HEC1 A	0.0227	0.187	P > 0.05	ns
HEC1 B	0.0575	0.473	P > 0.05	ns
HEC1 C	0.0351	0.289	P > 0.05	ns
HEC1 D	0.00501	0.0412	P > 0.05	ns
HEC1 E	0.0835	0.687	P > 0.05	ns
HEC1 F	0.113	0.931	P > 0.05	ns
HEC1 G	0.047	0.387	P > 0.05	ns
ett-3 vs ett-3 +IAA
Row Factor	ett-3	ett-3 +IAA	Difference	95% CI of diff.
HEC1 A	0.158	0.17	0.0119	-0.403 to 0.427
HEC1 B	1.86	1.5	-0.359	-0.774 to 0.0566
HEC1 C	1.11	0.735	-0.371	-0.786 to 0.0440
HEC1 D	0.914	0.87	-0.0446	-0.460 to 0.371
HEC1 E	0.556	0.387	-0.169	-0.584 to 0.246
HEC1 F	0.271	0.305	0.0342	-0.381 to 0.449
HEC1 G	0.296	0.318	0.0219	-0.393 to 0.437
Row Factor	Difference	t	P value	Summary
HEC1 A	0.0119	0.098	P > 0.05	ns
HEC1 B	-0.359	2.95	P > 0.05	ns
HEC1 C	-0.371	3.05	P > 0.05	ns
HEC1 D	-0.0446	0.367	P > 0.05	ns
HEC1 E	-0.169	1.39	P > 0.05	ns
HEC1 F	0.0342	0.281	P > 0.05	ns
HEC1 G	0.0219	0.18	P > 0.05	ns
Figure 5e
Table Analyzed	ChIP H3K27Ac-PID
Two-way ANOVA
Source of Variation	% of total variation	P value
Interaction	17.17	< 0.0001
Column Factor	14.09	< 0.0001
Row Factor	63.79	< 0.0001
Source of Variation	P value summary	Significant?
Interaction	****	Yes
Column Factor	****	Yes
Row Factor	****	Yes
Source of Variation	Df	Sum-of-squares	Mean square	F
Interaction	18	1.569	0.08717	10.81
Column Factor	3	1.288	0.4292	53.22
Row Factor	6	5.829	0.9715	120.5
Residual	56	0.4516	0.008065
Number of missing values	0
Bonferroni multiple comparisons	Number of comparisons: 42
Col-0 vs Col-0 +IAA
Row Factor	Col-0	Col-0 +IAA	Difference	95% CI of diff.
PID A	0.1831	0.1201	-0.06302	-0.3135 to 0.1874
PID B	0.3136	0.8734	0.5598	0.3094 to 0.8103
PID C	0.1408	0.3881	0.2474	-0.003084 to 0.4978
PID D	0.1218	0.2436	0.1218	-0.1286 to 0.3723
PID E	0.257	0.5096	0.2525	0.002095 to 0.5030
PID F	0.1866	0.2752	0.08858	-0.1619 to 0.3390
PID G	0.08243	0.1161	0.03372	-0.2167 to 0.2842
Row Factor	Difference	t	P value	Summary
PID A	-0.06302	0.8594	P > 0.05	ns
PID B	0.5598	7.635	P < 0.0001	****
PID C	0.2474	3.374	P > 0.05	ns
PID D	0.1218	1.661	P > 0.05	ns
PID E	0.2525	3.444	P < 0.05	*
PID F	0.08858	1.208	P > 0.05	ns
PID G	0.03372	0.4598	P > 0.05	ns
Col-0 vs ett-3
Row Factor	Col-0	ett-3	Difference	95% CI of diff.
PID A	0.1831	0.3059	0.1227	-0.1277 to 0.3732
PID B	0.3136	1.444	1.13	0.8800 to 1.381
PID C	0.1408	0.4002	0.2595	0.009026 to 0.5099
PID D	0.1218	0.3126	0.1908	-0.05966 to 0.4412
PID E	0.257	0.5913	0.3343	0.08382 to 0.5847
PID F	0.1866	0.2584	0.07176	-0.1787 to 0.3222
PID G	0.08243	0.1173	0.03487	-0.2156 to 0.2853
Row Factor	Difference	t	P value	Summary
PID A	0.1227	1.674	P > 0.05	ns
PID B	1.13	15.42	P < 0.0001	****
PID C	0.2595	3.539	P < 0.05	*
PID D	0.1908	2.602	P > 0.05	ns
PID E	0.3343	4.559	P < 0.01	**
PID F	0.07176	0.9786	P > 0.05	ns
PID G	0.03487	0.4755	P > 0.05	ns
Col-0 vs ett-3 +IAA
Row Factor	Col-0	ett-3 +IAA	Difference	95% CI of diff.
PID A	0.1831	0.1552	-0.02794	-0.2784 to 0.2225
PID B	0.3136	1.206	0.8927	0.6422 to 1.143
PID C	0.1408	0.524	0.3832	0.1328 to 0.6337
PID D	0.1218	0.339	0.2172	-0.03324 to 0.4677
PID E	0.257	0.6504	0.3934	0.1429 to 0.6438
PID F	0.1866	0.3602	0.1736	-0.07684 to 0.4241
PID G	0.08243	0.1352	0.05278	-0.1977 to 0.3032
Row Factor	Difference	t	P value	Summary
PID A	-0.02794	0.381	P > 0.05	ns
PID B	0.8927	12.17	P < 0.0001	****
PID C	0.3832	5.226	P < 0.001	***
PID D	0.2172	2.962	P > 0.05	ns
PID E	0.3934	5.365	P < 0.0001	****
PID F	0.1736	2.368	P > 0.05	ns
PID G	0.05278	0.7197	P > 0.05	ns
Col-0 +IAA vs ett-3
Row Factor	Col-0 +IAA	ett-3	Difference	95% CI of diff.
PID A	0.1201	0.3059	0.1858	-0.06469 to 0.4362
PID B	0.8734	1.444	0.5707	0.3202 to 0.8211
PID C	0.3881	0.4002	0.01211	-0.2383 to 0.2626
PID D	0.2436	0.3126	0.06896	-0.1815 to 0.3194
PID E	0.5096	0.5913	0.08172	-0.1687 to 0.3322
PID F	0.2752	0.2584	-0.01682	-0.2673 to 0.2336
PID G	0.1161	0.1173	0.001148	-0.2493 to 0.2516
Row Factor	Difference	t	P value	Summary
PID A	0.1858	2.533	P > 0.05	ns
PID B	0.5707	7.783	P < 0.0001	****
PID C	0.01211	0.1651	P > 0.05	ns
PID D	0.06896	0.9405	P > 0.05	ns
PID E	0.08172	1.115	P > 0.05	ns
PID F	-0.01682	0.2294	P > 0.05	ns
PID G	0.001148	0.01566	P > 0.05	ns
Col-0 +IAA vs ett-3 +IAA
Row Factor	Col-0 +IAA	ett-3 +IAA	Difference	95% CI of diff.
PID A	0.1201	0.1552	0.03508	-0.2154 to 0.2855
PID B	0.8734	1.206	0.3328	0.08238 to 0.5833
PID C	0.3881	0.524	0.1358	-0.1146 to 0.3863
PID D	0.2436	0.339	0.09539	-0.1551 to 0.3458
PID E	0.5096	0.6504	0.1408	-0.1096 to 0.3913
PID F	0.2752	0.3602	0.08504	-0.1654 to 0.3355
PID G	0.1161	0.1352	0.01906	-0.2314 to 0.2695
Row Factor	Difference	t	P value	Summary
PID A	0.03508	0.4784	P > 0.05	ns
PID B	0.3328	4.539	P < 0.01	**
PID C	0.1358	1.853	P > 0.05	ns
PID D	0.09539	1.301	P > 0.05	ns
PID E	0.1408	1.921	P > 0.05	ns
PID F	0.08504	1.16	P > 0.05	ns
PID G	0.01906	0.2599	P > 0.05	ns
ett-3 vs ett-3 +IAA
Row Factor	ett-3	ett-3 +IAA	Difference	95% CI of diff.
PID A	0.3059	0.1552	-0.1507	-0.4011 to 0.09977
PID B	1.444	1.206	-0.2378	-0.4883 to 0.01261
PID C	0.4002	0.524	0.1237	-0.1267 to 0.3742
PID D	0.3126	0.339	0.02643	-0.2240 to 0.2769
PID E	0.5913	0.6504	0.05911	-0.1913 to 0.3096
PID F	0.2584	0.3602	0.1019	-0.1486 to 0.3523
PID G	0.1173	0.1352	0.01791	-0.2325 to 0.2684
Row Factor	Difference	t	P value	Summary
PID A	-0.1507	2.055	P > 0.05	ns
PID B	-0.2378	3.244	P > 0.05	ns
PID C	0.1237	1.687	P > 0.05	ns
PID D	0.02643	0.3604	P > 0.05	ns
PID E	0.05911	0.8062	P > 0.05	ns
PID F	0.1019	1.389	P > 0.05	ns
PID G	0.01791	0.2442	P > 0.05	ns
